# Supplementary material
Source: PubMed Central journal article supplement (PMC4143048)
Supplement: 1406886111_pnas.201406886SI.pdf [file 1406886111_pnas.201406886SI.pdf]

# Supporting Information

Rodríguez-Verdugo et al. 10.1073/pnas.1406886111

## SI Materials and Methods

**Estimation of Relative Fitness.** Briefly, both competitors (the Ara-evolved line and the ancestral Ara+ REL1207 strain) were revived in Luria–Bertani (LB) broth and grown separately for 1 d at 37 °C and a second day at the temperature of interest (20 °C or 37 °C) in 10 mL DM25. Then the two competitors were mixed at a 1:1 volumetric ratio and diluted 100-fold into 10 mL fresh DM25 and incubated 1 d at the assay temperature. The initial and final densities were estimated by plating the culture onto tetrazolium-arabinose (TA) agar plates.

**Estimation of Absolute Fitness.** Briefly, the assays began by reviving the clones in 1 mL LB and incubating overnight at 37 °C with constant shaking (100 rpm). The following day, cultures were diluted 100-fold into MgSO<sub>4</sub> (10 mM solution) and 10 µl of this dilution was transferred into 990 µl DM25. The 96-well plates (Megatiter plates, Neptune) were covered with gas permeable seals (Thermo Scientific) and incubated 1 d at 37 °C (day 0) to allow the clones to acclimate to culture conditions. The following days (days 1–3), we transferred 10 µl of the overnight culture in 990 µl of fresh DM25 (100-fold dilution) and we incubated the plates at the assay temperature. The plates were incubated in a shaking incubator (Innova 4300) with an accuracy of ±0.25 °C. At the end of each day we measured population densities using an electronic particle counter (Coulter Counter model Multisizer 3 equipped with a 30-µm-diameter aperture tube). To measure density, 50 µl of culture was diluted in 9.9 mL IsotonII diluent (Beckman Coulter), and 50 µl of the resulting dilution was counted electronically. We subtracted the background noise to the counts by measuring the number of particle in 50 µl sterile DM25. Our pilot study showed a high correlation between the densities estimated with viable cell counts (colony-forming units) and estimated with electronic counts ( $R^2 = 0.867$ ,  $P = 7.55^{-15^{***}}$ ).

To estimate the absolute fitness we used a fixed effects linear model, in which we defined the natural logarithm of the cell density as the dependent variable, and the time (daily transfers) as the independent variable. The cell density from the first day of acclimation (day 0) was excluded from the regression.

Let  $y_{r,d}^l$  be the natural logarithm of the bacterial density, in which  $d$  is the day of transfer,  $l$  is the line analyzed (high-temperature adapted clones or the ancestor), and  $r$  is the replicate. We used the following model:

$$y_{r,d}^l = (\beta_{o,1} * 1_{r=1} + \beta_{o,2} * 1_{r=2} + \beta_{o,3} * 1_{r=3}) + \beta_1 * d + \varepsilon_{r,d}^l,$$

where  $\beta_0$  is the intercept for each replicate,  $\beta_1$  is the regression coefficient, and  $\varepsilon_{r,d}^l$  is the error term. The slope of the fitted linear regression  $\beta_1$  is equivalent to the absolute fitness of a given genotype at a given temperature.

**Strain Construction and Confirmation of Recombinants.** We used the pJk611 recombineering plasmid, kindly provided by M. Raffatellu, Department of Microbiology and Molecular Genetics, University of California, Irvine, CA. The pJk611 plasmid is identical to the pKD46 plasmid, with the addition of a *sacB* gene used to eliminate the plasmid when counterselected on LB with sucrose.

Briefly, we first introduced the pJk611 plasmid into the ancestral strain, electroporating 2 µl plasmid (containing between 0.5 and 1 µg plasmid) into 50 µl of competent cells using an Eppendorf Electroporator 2510 set at 1.8 kV. Following electroporation, we added 1 mL LB and incubated the cells at 30 °C for 2 h with shaking. We then plated 100 µl of cells on LB agar

plates containing 100 µg/mL ampicillin to select ampicillin-resistant (*amp<sup>R</sup>*) transformants. The ancestral strain carrying the pJk611 plasmid was then grown overnight at room temperature (~20 °C) in 25 mL LB with 100 µg/mL ampicillin and 1 mM L-arabinose (Sigma) until it reached an OD<sub>600</sub> of 0.6. We made electro-competent cells by washing the cultures five times with ice-cold water. We simultaneously introduce two oligos of 70 bp with the desired nucleotide change in the center of the oligo (Table S3). The first oligo was used to introduce single mutation in *rpoB* or *rho*; the second oligo was to introduce the mutation that produces the Ara+ phenotype. Two µl of each oligo (10 µM) was electroporated into 50 µl of cells. After electroporation we added 1 mL LB and incubated cells at 37 °C for 3 h with shaking and spread 500 µl in minimal medium agar (MA) plates supplemented with L-arabinose. The remainder was grown overnight at room temperature and 100 µl was spread in MA plates. The plates were incubated 48 h at 42 °C. We selected 94 single colonies and streaked them onto TA agar plates, incubated overnight at 37 °C. We screened for the mutations by doing PCR on single colonies to amplify the region of the *rpoB* or *rho* gene with the mutation and Sanger sequencing the fragments of ~370 bp (Table S3). The PCR thermal cycling conditions were 94 °C for 10 min followed by 30 cycles of 94 °C 20 s, 60 °C 30 s, and 68 °C 1 min; finally 68 °C for 5 min.

**Genetic Associations.** We first created a list of unique mutations (these mutations can be any kind of molecular change, from point mutations to large deletions) occurring in 114 high-temperature adapted clones. We then selected five of the most commonly shared mutations (mutations shared by 14 or more clones), which represent a disjoint set at the right tail of the frequency distribution (Fig. S3), to explore the effect of each mutation on the absolute fitness (Table 1).

We selected  $L_m$ , which is the list of the high-temperature adapted clones in which the mutation  $m$  occurred (see Fig. S7 for a simplified example). We then found all of the mutations occurring in  $L_m$ , denoted by  $M_m$  (including  $m$ ), and included them in the analysis.

Except for the mutations that are shared in more than one clone, most of the mutations are cooccurring in the same clone, which prevents us from drawing conclusions regarding the effect of single mutations on the phenotype. To overcome this problem, we partitioned the mutations into clusters  $C$ . A cluster is a subset of mutations that always occur together, and it contains a mutation  $m$  if and only if  $m \in C$  for all lines in  $L_m$ . If a mutation has no cooccurring mutation, then it forms its own cluster. We created a cluster incidence matrix showing the presence or absence of a cluster in a clone (Fig. S7). We then combined the cluster incidence matrix with the continuous data of absolute fitness at 18 °C to fit the following fixed effects linear model:

$$y_{r,d}^l = (\beta_0^{l=1} * 1_{l=1} + \dots + \beta_0^{l=n} * 1_{l=n}) + \beta_1 * d + (\beta_{1,m_1} * d * 1_{m_1} + \dots + \beta_{1,m_M} * d * 1_{m_M}) + \varepsilon_{r,d}^l,$$

where  $m_1, \dots, m_M$  are the groups of mutations that are being analyzed. In our model,  $\beta_0^{l=1} * 1_{l=1} + \dots + \beta_0^{l=n} * 1_{l=n}$  are the intercepts coefficients associate with each clone,  $\beta_1$  is the absolute fitness of the overall population (all clones in  $L_m$ ) without the effect of the mutations  $m_1$  to  $m_M$ . In our model, the effect of the presence of the mutation  $m_i$  on the absolute fitness is given by the coefficient  $\beta_{1,m_i}$ .

In short, the model fitted a regression line for each one of the clones, where the slope of the regression for a given clone is given by the sum of the individual slope coefficient of the occurring mutations in that clone.

Finally, for each one of the most commonly shared mutations we selected a final model based on the lowest Akaike Information Criterion

and goodness of fit to obtain a parsimonious model that quantifies the contribution of each mutation group to the overall population fitness.

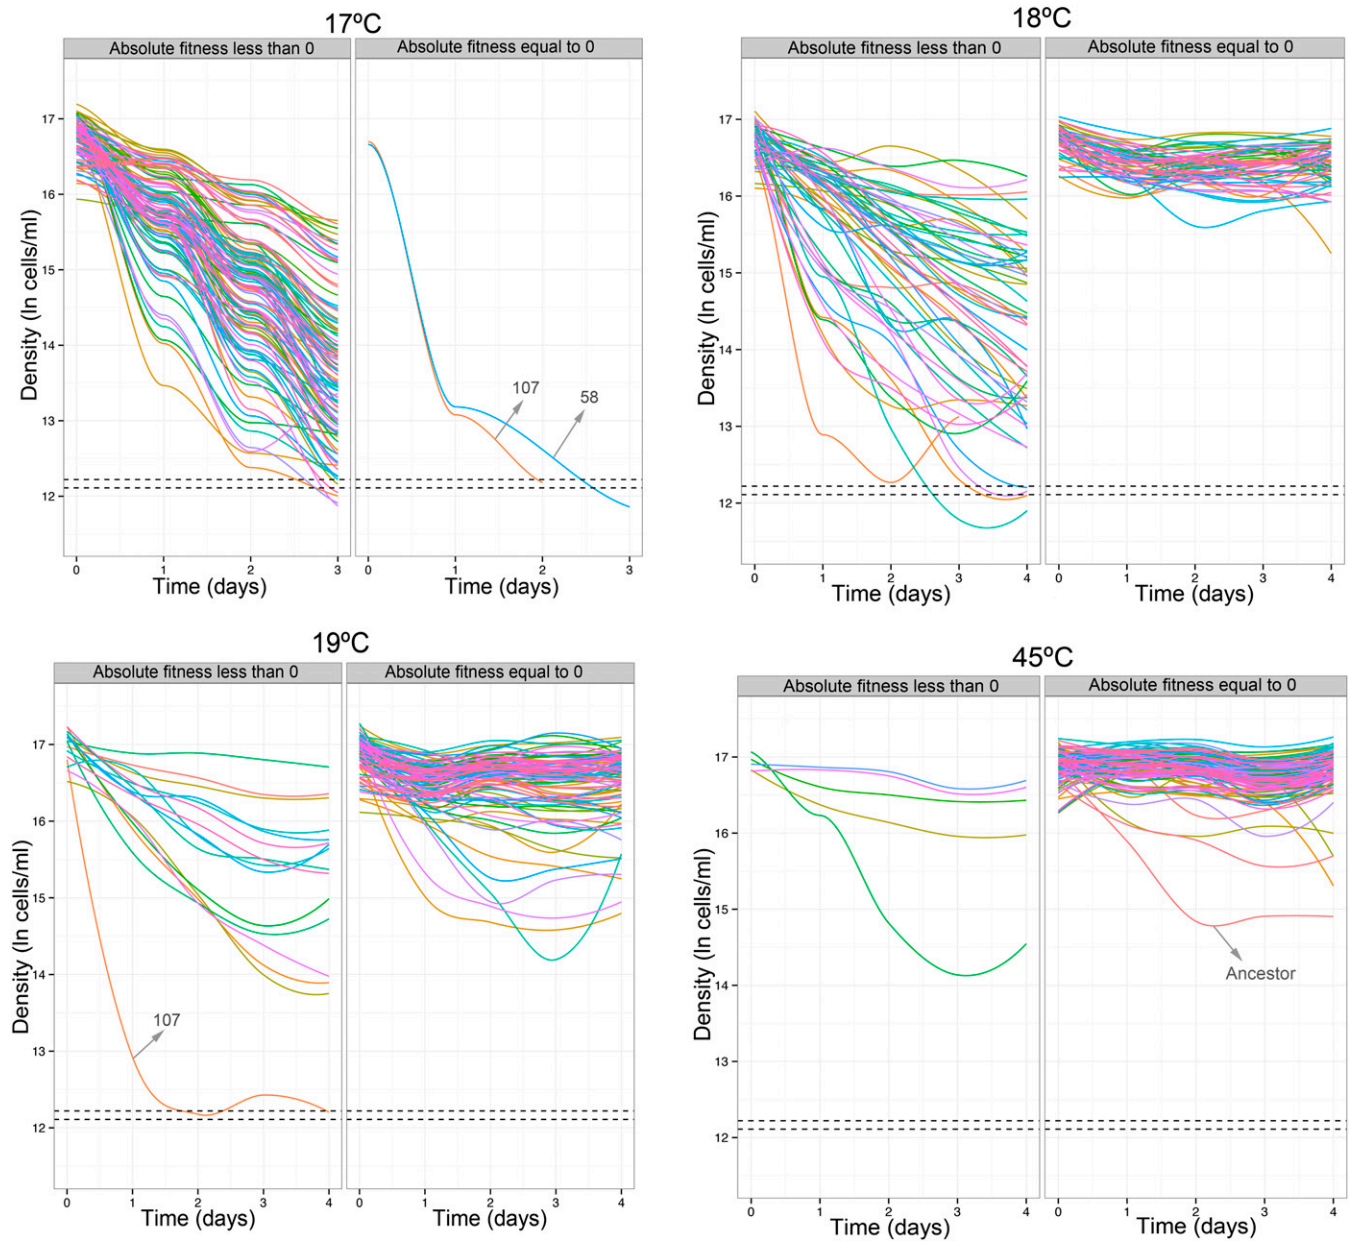

**Fig. S1.** Population density trajectories of the 114 high-temperature adapted clones and the ancestor at 17 °C, 18 °C, 19 °C, and 45 °C. For each temperature, the clones are divided in two groups: (*Left*), which contains the clones in which the slope of the regression is significantly less than zero; and (*Right*), which contains the clones in which the slope of the regression is not significantly different from zero (Table S2). Each line corresponds to a local polynomial regression fitting of three replicates. The two horizontal dotted lines correspond to background noise (SE limits estimated from the mean number of particles present in 71 samples of sterile DM25). Populations crossing the dotted lines are considered extinct. When the background noise was higher than the population density (negative value), the point was excluded from the analysis.



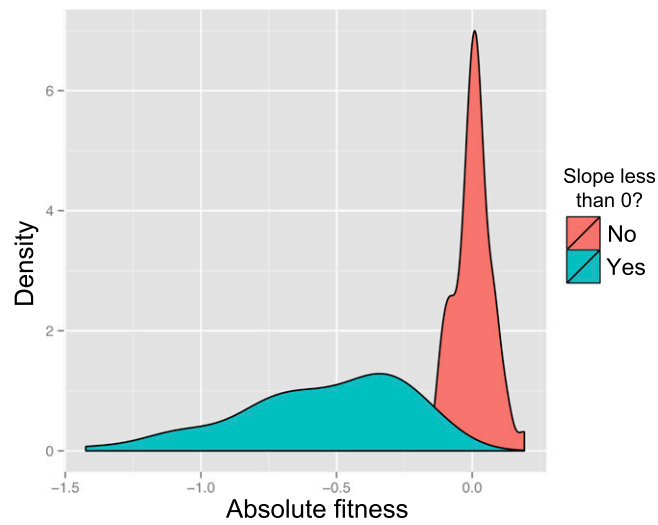

**Fig. S4.** Kernel density plot from the absolute fitness data at 18 °C. The area under the curve represents the empirical probability of occurrence of an absolute fitness value at 18 °C, for the population of 114 high-temperature adapted clones.

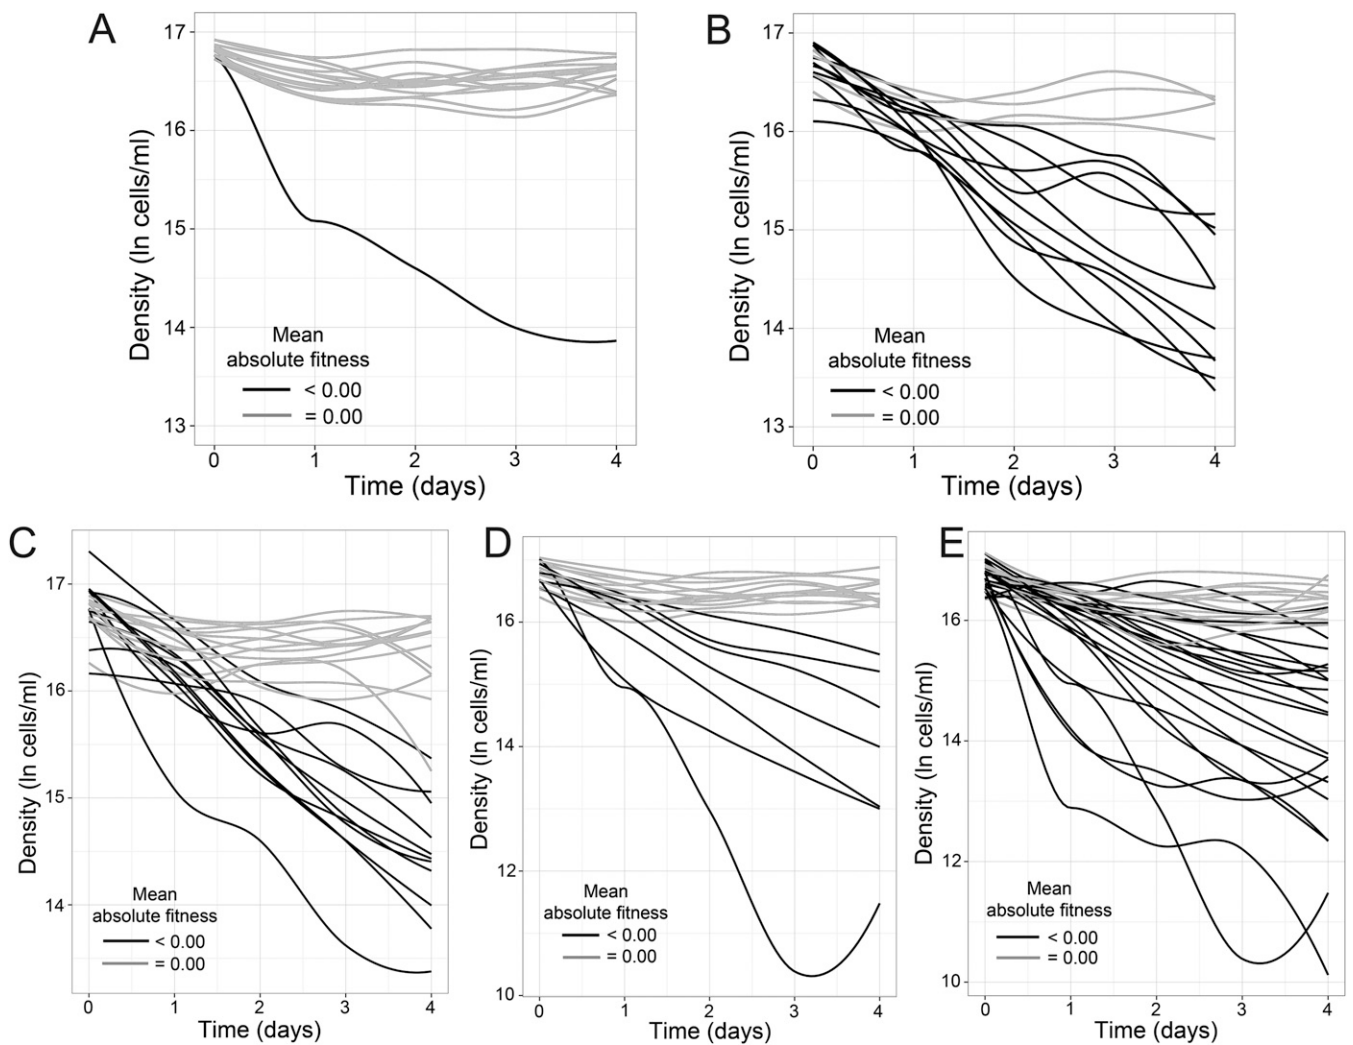

**Fig. S5.** Population density trajectories of the high-temperature evolved clones with the (A) *rho* 115N mutation, (B) *rpoB* I966S mutation, (C) 1-bp deletion, (D) 23164 bp large deletion, and (E) 71416 bp large deletion.

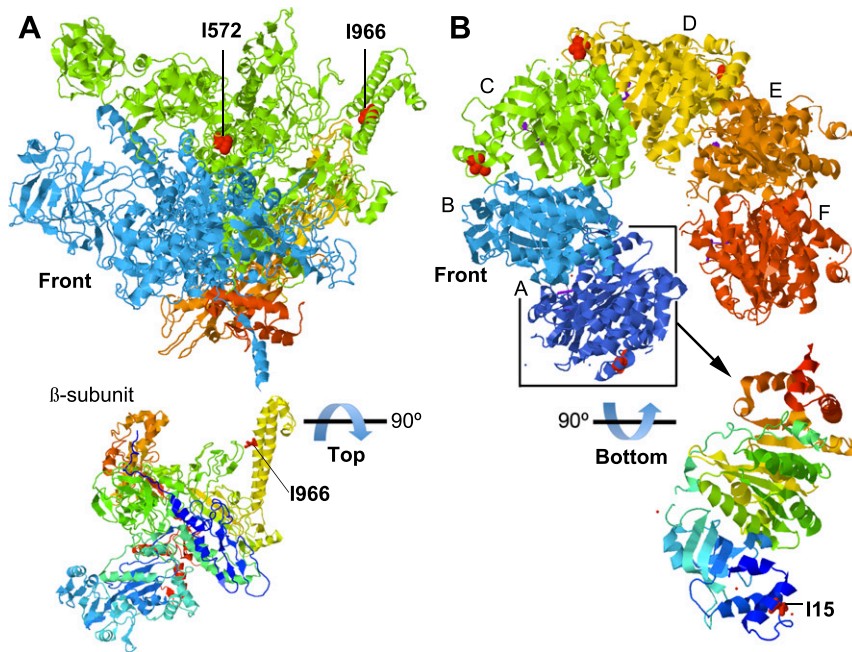

**Fig. S6.** Structural mapping of the codons analyzed. (A) Front view of the RNAP from *Escherichia coli* [Protein Data Bank (PDB) ID code 3LUO], color-coded as follows:  $\alpha$  and  $\alpha$ II, yellow;  $\beta$ , green;  $\beta'$ , blue;  $\omega$ , orange. Residues I572 (in the active site of the RNAP) and I966 (at the base of the flap domain) are shown as red spheres. Below is the top view of a ribbon diagram of the  $\beta$ -subunit colored from the N terminus (blue) to the C terminus (red) using a rainbow color gradient. Solvent-exposed residues in the back face of the ladder, including residue I966, are believed to interact with an unidentified regulatory factor. (B) Front view of the Rho hexamer from *E. coli* (PDB ID code 1PV4). Residue I15 is shown as red sphere. Below is the bottom view of a Rho protomer colored from the N terminus (blue) to the C terminus (red) using a rainbow color gradient.

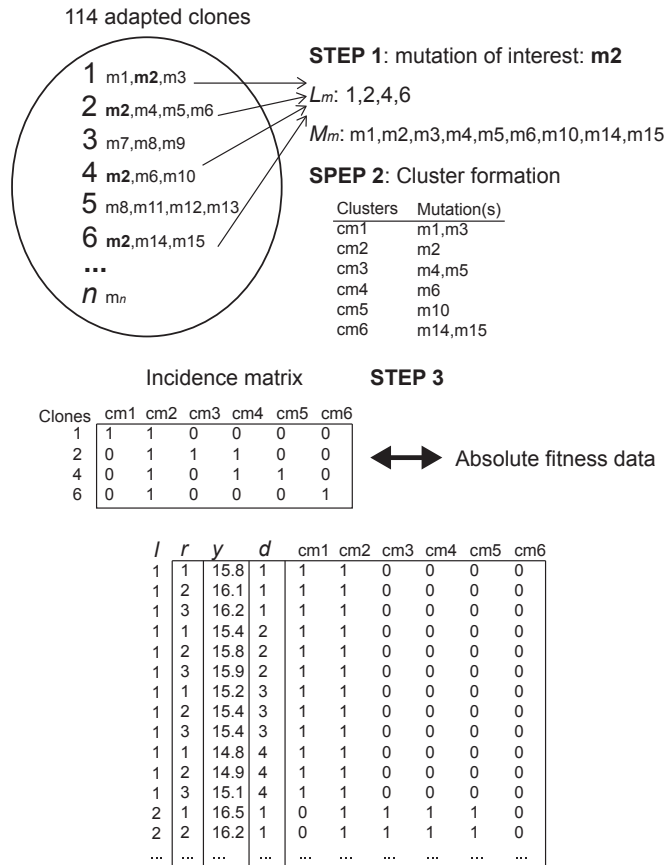

**Fig. S7.** Schematic representation of the procedure followed to prepare the data that were analyzed in the genetic association study. In this simplified example, only six high-temperature adapted clones with few mutations are considered. The first step consists of the selection of the mutations and the high-temperature clones to be analyzed. The second step consists of forming clusters of mutations cooccurring in the same clone. In the last step, the mutation clusters incidence matrix is combined with the absolute fitness data, containing the values of bacterial density (*y*) of the high-temperature adapted clones (*l*), measured in different days (*d*) and with several replicates (*r*).

**Table S1. Statistical analyses summary of the relative fitnesses of the 114 high-temperature adapted clones at 20 °C, 37 °C (this study), and 42.2°**

| High-temperature adapted clones | Mean fitness at 20 °C ± SE <sup>a</sup> |                      |       | Significance (P value) <sup>c</sup> | Mean fitness at 37 °C ± SE <sup>a</sup> |                      |       | Significance (P value) <sup>c</sup> | Mean fitness at 42.2 °C ± SE <sup>a</sup> (1) |                      |       | Significance (P value) <sup>c</sup> |
|---------------------------------|-----------------------------------------|----------------------|-------|-------------------------------------|-----------------------------------------|----------------------|-------|-------------------------------------|-----------------------------------------------|----------------------|-------|-------------------------------------|
|                                 |                                         | ±95% CI <sup>b</sup> |       |                                     |                                         | ±95% CI <sup>b</sup> |       |                                     |                                               | ±95% CI <sup>b</sup> |       |                                     |
| 1                               | 0.853                                   | 0.013                | 0.058 | 0.008**                             | 0.998                                   | 0.016                | 0.067 | 0.924                               | 1.409                                         | 0.024                | 0.063 | <0.001***                           |
| 2                               | 0.986                                   | 0.035                | 0.151 | 0.723                               | 0.989                                   | 0.031                | 0.134 | 0.753                               | 1.484                                         | 0.062                | 0.160 | 0.001**                             |
| 3                               | 0.981                                   | 0.019                | 0.050 | 0.370                               | 0.922                                   | 0.013                | 0.057 | 0.028*                              | 1.257                                         | 0.065                | 0.167 | 0.011*                              |
| 4                               | 0.936                                   | 0.023                | 0.058 | 0.038*                              | 1.004                                   | 0.014                | 0.062 | 0.820                               | 1.327                                         | 0.079                | 0.202 | 0.009**                             |
| 5                               | 1.023                                   | 0.024                | 0.062 | 0.386                               | 0.958                                   | 0.032                | 0.139 | 0.326                               | 1.559                                         | 0.109                | 0.279 | 0.004**                             |
| 7                               | 0.980                                   | 0.028                | 0.120 | 0.553                               | 0.874                                   | 0.029                | 0.123 | 0.048*                              | 1.529                                         | 0.054                | 0.139 | <0.001***                           |
| 8                               | 0.958                                   | 0.013                | 0.033 | 0.023*                              | 0.935                                   | 0.030                | 0.130 | 0.164                               | 1.525                                         | 0.032                | 0.082 | <0.001***                           |
| 9                               | 0.834                                   | 0.013                | 0.032 | 0.000***                            | 0.970                                   | 0.036                | 0.153 | 0.493                               | 1.472                                         | 0.051                | 0.130 | <0.001***                           |
| 10                              | 1.011                                   | 0.009                | 0.040 | 0.355                               | 1.019                                   | 0.033                | 0.085 | 0.598                               | 1.667                                         | 0.072                | 0.186 | <0.001***                           |
| 11                              | 0.866                                   | 0.029                | 0.123 | 0.043*                              | 0.826                                   | 0.025                | 0.108 | 0.020*                              | 1.244                                         | 0.032                | 0.083 | 0.001**                             |
| 12                              | 0.882                                   | 0.028                | 0.121 | 0.053.                              | 0.960                                   | 0.019                | 0.048 | 0.084.                              | 1.323                                         | 0.048                | 0.124 | 0.001**                             |
| 13                              | 0.926                                   | 0.011                | 0.046 | 0.020*                              | 0.986                                   | 0.018                | 0.076 | 0.504                               | 1.566                                         | 0.078                | 0.200 | 0.001**                             |
| 14                              | 0.897                                   | 0.003                | 0.014 | 0.001**                             | 1.006                                   | 0.023                | 0.060 | 0.819                               | 1.603                                         | 0.090                | 0.231 | 0.001**                             |
| 15                              | 0.973                                   | 0.021                | 0.089 | 0.321                               | 0.990                                   | 0.045                | 0.192 | 0.841                               | 1.499                                         | 0.070                | 0.180 | 0.001**                             |
| 16                              | 0.888                                   | 0.016                | 0.068 | 0.019*                              | 0.948                                   | 0.028                | 0.120 | 0.201                               | 1.272                                         | 0.070                | 0.180 | 0.012*                              |
| 17                              | 0.973                                   | 0.025                | 0.106 | 0.381                               | 0.944                                   | 0.031                | 0.132 | 0.207                               | 1.460                                         | 0.044                | 0.113 | <0.001***                           |
| 18                              | 0.698                                   | 0.065                | 0.167 | 0.043*                              | 0.889                                   | 0.026                | 0.110 | 0.049*                              | 1.561                                         | 0.104                | 0.267 | 0.003**                             |
| 20                              | 0.861                                   | 0.028                | 0.120 | 0.038*                              | 0.995                                   | 0.023                | 0.097 | 0.845                               | 1.278                                         | 0.053                | 0.137 | 0.003**                             |
| 21                              | 0.967                                   | 0.023                | 0.097 | 0.286                               | 1.019                                   | 0.016                | 0.040 | 0.272                               | 1.478                                         | 0.118                | 0.303 | 0.010*                              |
| 22                              | 0.867                                   | 0.021                | 0.053 | 0.001**                             | 0.962                                   | 0.003                | 0.014 | 0.008**                             | 1.325                                         | 0.042                | 0.107 | 0.001**                             |
| 23                              | 0.996                                   | 0.018                | 0.076 | 0.837                               | 1.027                                   | 0.030                | 0.131 | 0.464                               | 1.129                                         | 0.035                | 0.089 | 0.014*                              |
| 24                              | 0.900                                   | 0.025                | 0.065 | 0.011*                              | 1.003                                   | 0.024                | 0.103 | 0.913                               | 1.570                                         | 0.067                | 0.172 | <0.001***                           |
| 25                              | 0.897                                   | 0.011                | 0.027 | 0.000***                            | 0.946                                   | 0.035                | 0.151 | 0.261                               | 1.184                                         | 0.038                | 0.098 | 0.005**                             |
| 26                              | 1.006                                   | 0.025                | 0.106 | 0.842                               | 0.939                                   | 0.011                | 0.048 | 0.031*                              | 1.503                                         | 0.037                | 0.102 | <0.001***                           |
| 27                              | 0.900                                   | 0.014                | 0.036 | 0.001**                             | 0.966                                   | 0.007                | 0.030 | 0.039*                              | 1.243                                         | 0.058                | 0.150 | 0.009**                             |
| 28                              | 0.790                                   | 0.009                | 0.022 | 0.000***                            | 1.010                                   | 0.044                | 0.188 | 0.846                               | 1.503                                         | 0.083                | 0.214 | 0.002**                             |
| 31                              | 0.742                                   | 0.037                | 0.161 | 0.020*                              | 0.997                                   | 0.041                | 0.175 | 0.947                               | 1.330                                         | 0.049                | 0.126 | 0.001**                             |
| 32                              | 0.948                                   | 0.016                | 0.068 | 0.080.                              | 1.034                                   | 0.021                | 0.054 | 0.169                               | 1.290                                         | 0.042                | 0.109 | 0.001**                             |
| 33                              | 0.646                                   | 0.020                | 0.084 | 0.003**                             | 1.014                                   | 0.009                | 0.038 | 0.247                               | 1.402                                         | 0.036                | 0.092 | <0.001***                           |
| 34                              | 0.978                                   | 0.029                | 0.124 | 0.521                               | 1.013                                   | 0.047                | 0.202 | 0.812                               | 1.510                                         | 0.059                | 0.152 | <0.001***                           |
| 35                              | 0.942                                   | 0.010                | 0.044 | 0.030*                              | 1.041                                   | 0.019                | 0.049 | 0.084.                              | 1.473                                         | 0.062                | 0.159 | 0.001**                             |
| 38                              | 0.964                                   | 0.041                | 0.176 | 0.476                               | 0.968                                   | 0.022                | 0.096 | 0.292                               | 1.483                                         | 0.054                | 0.140 | <0.001***                           |
| 39                              | 0.956                                   | 0.015                | 0.066 | 0.104                               | 0.968                                   | 0.018                | 0.076 | 0.210                               | 1.437                                         | 0.068                | 0.174 | 0.001**                             |
| 40                              | 0.706                                   | 0.050                | 0.216 | 0.028*                              | 0.942                                   | 0.005                | 0.020 | 0.006**                             | 1.368                                         | 0.037                | 0.095 | <0.001***                           |
| 41                              | 0.897                                   | 0.012                | 0.051 | 0.013*                              | 0.959                                   | 0.008                | 0.032 | 0.032*                              | 1.306                                         | 0.061                | 0.157 | 0.004**                             |
| 42                              | 0.834                                   | 0.038                | 0.164 | 0.049*                              | 0.964                                   | 0.036                | 0.156 | 0.422                               | 1.561                                         | 0.053                | 0.137 | <0.001***                           |
| 43                              | 0.865                                   | 0.018                | 0.047 | 0.001**                             | 0.970                                   | 0.041                | 0.176 | 0.544                               | 1.496                                         | 0.048                | 0.124 | <0.001***                           |
| 44                              | 0.932                                   | 0.052                | 0.224 | 0.320                               | 1.028                                   | 0.019                | 0.048 | 0.192                               | 1.516                                         | 0.078                | 0.201 | 0.001**                             |
| 45                              | 0.942                                   | 0.025                | 0.109 | 0.149                               | 0.993                                   | 0.022                | 0.095 | 0.793                               | 1.293                                         | 0.061                | 0.156 | 0.005**                             |
| 46                              | 0.941                                   | 0.034                | 0.145 | 0.222                               | 1.030                                   | 0.013                | 0.035 | 0.077.                              | 1.473                                         | 0.063                | 0.161 | 0.001**                             |
| 47                              | 0.875                                   | 0.025                | 0.106 | 0.036*                              | 1.065                                   | 0.080                | 0.346 | 0.501                               | 1.546                                         | 0.077                | 0.197 | 0.001**                             |
| 48                              | 0.929                                   | 0.014                | 0.061 | 0.038*                              | 0.967                                   | 0.020                | 0.088 | 0.253                               | 1.298                                         | 0.065                | 0.180 | 0.010*                              |
| 51                              | 0.905                                   | 0.020                | 0.086 | 0.042*                              | 1.004                                   | 0.013                | 0.056 | 0.798                               | 1.349                                         | 0.078                | 0.200 | 0.006**                             |
| 52                              | 1.009                                   | 0.061                | 0.265 | 0.901                               | 0.972                                   | 0.027                | 0.115 | 0.411                               | 1.415                                         | 0.053                | 0.136 | 0.001**                             |
| 53                              | 0.911                                   | 0.029                | 0.125 | 0.093.                              | 0.982                                   | 0.028                | 0.122 | 0.581                               | 1.096                                         | 0.043                | 0.110 | 0.074.                              |
| 54                              | 0.916                                   | 0.012                | 0.050 | 0.018*                              | 0.995                                   | 0.035                | 0.149 | 0.904                               | 1.384                                         | 0.079                | 0.204 | 0.005**                             |
| 55                              | 0.792                                   | 0.034                | 0.146 | 0.026*                              | 0.896                                   | 0.023                | 0.100 | 0.046*                              | 1.390                                         | 0.091                | 0.235 | 0.008**                             |
| 56                              | 1.035                                   | 0.018                | 0.047 | 0.117                               | 0.940                                   | 0.015                | 0.039 | 0.011*                              | 1.319                                         | 0.070                | 0.179 | 0.006**                             |
| 57                              | 0.779                                   | 0.050                | 0.129 | 0.007**                             | 0.939                                   | 0.010                | 0.026 | 0.002**                             | 1.279                                         | 0.043                | 0.110 | 0.001**                             |
| 58                              | 0.932                                   | 0.008                | 0.019 | 0.012*                              | 0.832                                   | 0.020                | 0.087 | 0.014*                              | 1.419                                         | 0.092                | 0.235 | 0.006**                             |
| 59                              | 0.845                                   | 0.024                | 0.102 | 0.023*                              | 0.954                                   | 0.024                | 0.102 | 0.189                               | 1.383                                         | 0.066                | 0.170 | 0.002**                             |
| 60                              | 0.993                                   | 0.017                | 0.072 | 0.723                               | 1.016                                   | 0.021                | 0.053 | 0.487                               | 1.277                                         | 0.043                | 0.110 | 0.001**                             |
| 61                              | 0.835                                   | 0.030                | 0.130 | 0.032*                              | 0.998                                   | 0.026                | 0.112 | 0.952                               | 1.536                                         | 0.107                | 0.276 | 0.004**                             |
| 64                              | 0.870                                   | 0.004                | 0.018 | 0.001**                             | 0.906                                   | 0.008                | 0.022 | 0.000***                            | 1.495                                         | 0.073                | 0.187 | 0.001**                             |
| 65                              | 0.914                                   | 0.004                | 0.018 | 0.002**                             | 1.030                                   | 0.049                | 0.213 | 0.604                               | 1.405                                         | 0.052                | 0.134 | 0.001**                             |
| 66                              | 1.033                                   | 0.011                | 0.028 | 0.029*                              | 0.941                                   | 0.009                | 0.040 | 0.024*                              | 1.430                                         | 0.059                | 0.151 | 0.001**                             |
| 67                              | 0.926                                   | 0.025                | 0.106 | 0.095.                              | 0.969                                   | 0.006                | 0.027 | 0.037*                              | 1.378                                         | 0.032                | 0.082 | <0.001***                           |
| 68                              | 0.892                                   | 0.013                | 0.055 | 0.014*                              | 0.882                                   | 0.022                | 0.097 | 0.034*                              | 1.283                                         | 0.060                | 0.155 | 0.005**                             |
| 69                              | 0.907                                   | 0.032                | 0.138 | 0.102                               | 1.041                                   | 0.032                | 0.137 | 0.322                               | 1.541                                         | 0.047                | 0.121 | <0.001***                           |
| 70                              | 1.029                                   | 0.015                | 0.063 | 0.183                               | 0.992                                   | 0.025                | 0.064 | 0.752                               | 1.308                                         | 0.035                | 0.091 | <0.001***                           |

**Table S1. Cont.**

| High-temperature adapted clones | Mean fitness at 20 °C ± SE <sup>a</sup> |       |       | Significance (P value) <sup>c</sup> | Mean fitness at 37 °C ± SE <sup>a</sup> |       |       | Significance (P value) <sup>c</sup> | Mean fitness at 42.2 °C ± SE <sup>a</sup> (1) |       |       | Significance (P value) <sup>c</sup> |
|---------------------------------|-----------------------------------------|-------|-------|-------------------------------------|-----------------------------------------|-------|-------|-------------------------------------|-----------------------------------------------|-------|-------|-------------------------------------|
|                                 | ±95% CI <sup>b</sup>                    |       |       |                                     | ±95% CI <sup>b</sup>                    |       |       |                                     | ±95% CI <sup>b</sup>                          |       |       |                                     |
| 71                              | 0.833                                   | 0.023 | 0.099 | 0.018*                              | 0.900                                   | 0.029 | 0.073 | 0.017*                              | 1.270                                         | 0.060 | 0.154 | 0.006**                             |
| 72                              | 0.998                                   | 0.046 | 0.196 | 0.973                               | 0.992                                   | 0.021 | 0.090 | 0.736                               | 1.463                                         | 0.095 | 0.244 | 0.005**                             |
| 73                              | 1.031                                   | 0.016 | 0.069 | 0.192                               | 1.028                                   | 0.019 | 0.084 | 0.285                               | 1.419                                         | 0.062 | 0.160 | 0.001**                             |
| 74                              | 0.839                                   | 0.009 | 0.037 | 0.003**                             | 0.857                                   | 0.026 | 0.110 | 0.030*                              | 1.314                                         | 0.041 | 0.114 | 0.002**                             |
| 75                              | 0.881                                   | 0.012 | 0.053 | 0.011*                              | 1.085                                   | 0.025 | 0.064 | 0.019*                              | 1.357                                         | 0.062 | 0.158 | 0.002**                             |
| 76                              | 0.703                                   | 0.022 | 0.095 | 0.005**                             | 0.976                                   | 0.005 | 0.020 | 0.034*                              | 1.377                                         | 0.035 | 0.089 | <0.001***                           |
| 77                              | 0.912                                   | 0.022 | 0.094 | 0.057.                              | 0.930                                   | 0.004 | 0.016 | 0.003**                             | 1.430                                         | 0.096 | 0.248 | 0.007**                             |
| 78                              | 1.004                                   | 0.013 | 0.056 | 0.790                               | 1.033                                   | 0.062 | 0.269 | 0.653                               | 1.570                                         | 0.096 | 0.247 | 0.002**                             |
| 79                              | 0.953                                   | 0.014 | 0.062 | 0.081.                              | 0.977                                   | 0.018 | 0.078 | 0.326                               | 1.238                                         | 0.048 | 0.132 | 0.008**                             |
| 80                              | 0.955                                   | 0.030 | 0.078 | 0.196                               | 1.003                                   | 0.038 | 0.165 | 0.953                               | 1.270                                         | 0.079 | 0.203 | 0.019*                              |
| 81                              | 0.864                                   | 0.025 | 0.064 | 0.003**                             | 1.016                                   | 0.015 | 0.037 | 0.321                               | 1.480                                         | 0.078 | 0.201 | 0.002**                             |
| 82                              | 0.876                                   | 0.019 | 0.050 | 0.001**                             | 0.939                                   | 0.017 | 0.043 | 0.015*                              | 1.498                                         | 0.053 | 0.137 | <0.001***                           |
| 83                              | 0.995                                   | 0.030 | 0.128 | 0.881                               | 0.970                                   | 0.026 | 0.112 | 0.374                               | 1.178                                         | 0.036 | 0.092 | 0.004**                             |
| 84                              | 0.978                                   | 0.019 | 0.080 | 0.353                               | 0.999                                   | 0.017 | 0.044 | 0.971                               | 1.180                                         | 0.070 | 0.181 | 0.051.                              |
| 85                              | 0.848                                   | 0.020 | 0.085 | 0.017*                              | 0.996                                   | 0.013 | 0.034 | 0.758                               | 1.662                                         | 0.087 | 0.222 | 0.001**                             |
| 86                              | 0.866                                   | 0.014 | 0.061 | 0.011*                              | 0.952                                   | 0.019 | 0.050 | 0.055.                              | 1.310                                         | 0.077 | 0.198 | 0.010*                              |
| 87                              | 1.010                                   | 0.032 | 0.139 | 0.781                               | 1.015                                   | 0.032 | 0.139 | 0.689                               | 1.703                                         | 0.137 | 0.351 | 0.004**                             |
| 89                              | 0.941                                   | 0.044 | 0.189 | 0.313                               | 0.975                                   | 0.041 | 0.177 | 0.600                               | 1.387                                         | 0.046 | 0.117 | <0.001***                           |
| 91                              | 0.784                                   | 0.022 | 0.095 | 0.010*                              | 0.990                                   | 0.023 | 0.098 | 0.695                               | 1.472                                         | 0.057 | 0.146 | <0.001***                           |
| 92                              | 0.825                                   | 0.009 | 0.040 | 0.003**                             | 0.918                                   | 0.016 | 0.068 | 0.035*                              | 1.446                                         | 0.093 | 0.239 | 0.005**                             |
| 93                              | 0.907                                   | 0.011 | 0.049 | 0.015*                              | 1.010                                   | 0.019 | 0.081 | 0.650                               | 1.396                                         | 0.040 | 0.103 | <0.001***                           |
| 94                              | 0.968                                   | 0.001 | 0.005 | 0.001**                             | 0.941                                   | 0.007 | 0.028 | 0.012*                              | 1.767                                         | 0.134 | 0.344 | 0.002**                             |
| 95                              | 0.903                                   | 0.001 | 0.003 | 0.000***                            | 0.921                                   | 0.013 | 0.034 | 0.002**                             | 1.488                                         | 0.109 | 0.280 | 0.007**                             |
| 96                              | 0.934                                   | 0.048 | 0.124 | 0.302                               | 0.990                                   | 0.018 | 0.077 | 0.641                               | 1.439                                         | 0.105 | 0.270 | 0.009**                             |
| 97                              | 0.926                                   | 0.105 | 0.269 | 0.512                               | 0.978                                   | 0.019 | 0.049 | 0.310                               | 1.277                                         | 0.096 | 0.247 | 0.034*                              |
| 101                             | 0.976                                   | 0.018 | 0.047 | 0.248                               | 1.014                                   | 0.016 | 0.041 | 0.438                               | 1.404                                         | 0.031 | 0.079 | <0.001***                           |
| 105                             | 0.939                                   | 0.020 | 0.088 | 0.095.                              | 1.025                                   | 0.020 | 0.087 | 0.338                               | 1.397                                         | 0.038 | 0.097 | <0.001***                           |
| 106                             | 0.928                                   | 0.008 | 0.035 | 0.012*                              | 1.016                                   | 0.031 | 0.079 | 0.620                               | 1.383                                         | 0.100 | 0.258 | 0.012*                              |
| 107                             | Could not grow at 20 °C                 |       |       |                                     | 0.982                                   | 0.011 | 0.028 | 0.168                               | 1.635                                         | 0.061 | 0.157 | <0.001***                           |
| 108                             | 0.870                                   | 0.003 | 0.014 | 0.001**                             | 0.989                                   | 0.020 | 0.085 | 0.642                               | 1.671                                         | 0.112 | 0.289 | 0.002**                             |
| 110                             | 0.913                                   | 0.028 | 0.072 | 0.089.                              | 1.007                                   | 0.006 | 0.024 | 0.361                               | 1.469                                         | 0.073 | 0.187 | 0.001**                             |
| 112                             | 0.906                                   | 0.004 | 0.018 | 0.002**                             | 0.992                                   | 0.019 | 0.048 | 0.693                               | 1.230                                         | 0.085 | 0.218 | 0.042*                              |
| 114                             | 0.830                                   | 0.012 | 0.052 | 0.005**                             | 0.967                                   | 0.005 | 0.022 | 0.023*                              | 1.217                                         | 0.063 | 0.162 | 0.018*                              |
| 118                             | 0.849                                   | 0.022 | 0.056 | 0.001**                             | 0.935                                   | 0.004 | 0.017 | 0.004**                             | 1.612                                         | 0.039 | 0.101 | <0.001***                           |
| 119                             | 0.716                                   | 0.015 | 0.038 | 0.003**                             | 0.953                                   | 0.009 | 0.038 | 0.033*                              | 1.626                                         | 0.098 | 0.253 | 0.001**                             |
| 120                             | 0.807                                   | 0.020 | 0.086 | 0.011*                              | 0.954                                   | 0.015 | 0.039 | 0.029*                              | 1.300                                         | 0.055 | 0.153 | 0.005**                             |
| 122                             | 0.908                                   | 0.015 | 0.066 | 0.027*                              | 0.975                                   | 0.044 | 0.189 | 0.626                               | 1.381                                         | 0.033 | 0.084 | <0.001***                           |
| 124                             | 0.935                                   | 0.017 | 0.044 | 0.012*                              | 0.913                                   | 0.015 | 0.066 | 0.030*                              | 1.427                                         | 0.048 | 0.122 | <0.001***                           |
| 126                             | 0.998                                   | 0.017 | 0.043 | 0.929                               | 0.970                                   | 0.025 | 0.108 | 0.358                               | 1.544                                         | 0.061 | 0.157 | <0.001***                           |
| 127                             | 0.890                                   | 0.025 | 0.063 | 0.006**                             | 1.003                                   | 0.012 | 0.031 | 0.822                               | 1.387                                         | 0.047 | 0.120 | <0.001***                           |
| 130                             | 0.999                                   | 0.011 | 0.028 | 0.935                               | 0.990                                   | 0.010 | 0.041 | 0.392                               | 1.284                                         | 0.068 | 0.188 | 0.014*                              |
| 131                             | 0.968                                   | 0.026 | 0.114 | 0.348                               | 0.948                                   | 0.012 | 0.050 | 0.047*                              | 1.345                                         | 0.036 | 0.093 | <0.001***                           |
| 132                             | 1.009                                   | 0.015 | 0.066 | 0.601                               | 0.980                                   | 0.053 | 0.227 | 0.737                               | 1.432                                         | 0.082 | 0.212 | 0.003**                             |
| 133                             | 0.684                                   | 0.012 | 0.053 | 0.002**                             | 0.919                                   | 0.004 | 0.015 | 0.002**                             | 1.379                                         | 0.070 | 0.180 | 0.003**                             |
| 134                             | 1.032                                   | 0.017 | 0.044 | 0.118                               | 0.985                                   | 0.017 | 0.044 | 0.408                               | 1.380                                         | 0.053 | 0.136 | 0.001**                             |
| 135                             | 0.947                                   | 0.018 | 0.046 | 0.031*                              | 0.993                                   | 0.017 | 0.074 | 0.715                               | 1.473                                         | 0.056 | 0.143 | <0.001***                           |
| 136                             | 0.911                                   | 0.007 | 0.018 | 0.000***                            | 0.886                                   | 0.000 | 0.002 | 0.000***                            | 1.295                                         | 0.028 | 0.072 | <0.001***                           |
| 137                             | 0.932                                   | 0.006 | 0.025 | 0.008**                             | 0.927                                   | 0.008 | 0.036 | 0.013*                              | 1.349                                         | 0.041 | 0.104 | <0.001***                           |
| 138                             | 0.968                                   | 0.021 | 0.088 | 0.261                               | 1.011                                   | 0.017 | 0.043 | 0.558                               | 1.433                                         | 0.081 | 0.209 | 0.003**                             |
| 139                             | 0.877                                   | 0.015 | 0.039 | 0.000***                            | 0.966                                   | 0.024 | 0.104 | 0.299                               | 1.375                                         | 0.053 | 0.135 | 0.001**                             |
| 140                             | 0.981                                   | 0.024 | 0.104 | 0.516                               | 1.024                                   | 0.031 | 0.134 | 0.522                               | 1.648                                         | 0.039 | 0.101 | <0.001***                           |
| 141                             | 0.991                                   | 0.025 | 0.064 | 0.736                               | 0.956                                   | 0.009 | 0.038 | 0.038*                              | 1.460                                         | 0.055 | 0.141 | <0.001***                           |
| 142                             | 0.885                                   | 0.015 | 0.038 | 0.001**                             | 0.959                                   | 0.033 | 0.142 | 0.336                               | 1.609                                         | 0.067 | 0.172 | <0.001***                           |
| 143                             | 0.927                                   | 0.017 | 0.043 | 0.007**                             | 0.967                                   | 0.029 | 0.127 | 0.375                               | 1.540                                         | 0.081 | 0.208 | 0.001**                             |

<sup>a</sup>Mean relative fitness and SEM.

<sup>b</sup>95% confidence interval (CI).

<sup>c</sup>The null hypothesis is that mean fitness relative to the ancestor equals 1; probabilities calculated using a two-tailed t test. The asterisks represent significant deviation from the null hypothesis that mean fitness equals 1.0, with a single asterisk denoting significance at 0.01 < P < 0.05, double asterisks denoting significance at 0.001 < P < 0.01, and triple asterisks denoting significance at P < 0.001 and a dot denoting 0.05 < P < 0.1.

1. Tenailon O, et al. (2012) The molecular diversity of adaptive convergence. *Science* 335():457–461.



**Table S2. Statistical analyses summary of the absolute fitnesses of the ancestor and the 114 high-temperature adapted clones at 17 °C, 18 °C, 19 °C, and 45 °C**

| High-temperature adapted clones | Mean absolute fitness at 17 °C <sup>a</sup> | 95% CI (upper limit) <sup>b</sup> | Less than 0? <sup>c</sup> | Mean absolute fitness at 18 °C <sup>a</sup> | 95% CI (upper limit) <sup>b</sup> | Less than 0? <sup>c</sup> | Mean absolute fitness at 19 °C <sup>a</sup> | 95% CI (upper limit) <sup>b</sup> | Less than 0? <sup>c</sup> | Mean absolute fitness at 45 °C <sup>a</sup> | 95% CI (upper limit) <sup>b</sup> | Less than 0? <sup>c</sup> |
|---------------------------------|---------------------------------------------|-----------------------------------|---------------------------|---------------------------------------------|-----------------------------------|---------------------------|---------------------------------------------|-----------------------------------|---------------------------|---------------------------------------------|-----------------------------------|---------------------------|
| 1                               | -1.015                                      | -0.751                            | YES                       | -0.415                                      | -0.352                            | YES                       | -0.134                                      | -0.006                            | YES                       | -0.092                                      | 0.095                             | NO                        |
| 2                               | -0.301                                      | -0.059                            | YES                       | 0.057                                       | 0.134                             | NO                        | 0.018                                       | 0.091                             | NO                        | -0.916                                      | -0.312                            | YES                       |
| 3                               | -0.896                                      | -0.684                            | YES                       | -0.024                                      | 0.048                             | NO                        | 0.022                                       | 0.121                             | NO                        | 0.015                                       | 0.062                             | NO                        |
| 4                               | -1.300                                      | -1.084                            | YES                       | -0.543                                      | -0.405                            | YES                       | -0.219                                      | -0.067                            | YES                       | -0.038                                      | 0.017                             | NO                        |
| 5                               | -0.931                                      | -0.818                            | YES                       | -0.089                                      | 0.095                             | NO                        | 0.115                                       | 0.216                             | NO                        | -0.036                                      | 0.041                             | NO                        |
| 7                               | -0.480                                      | -0.303                            | YES                       | -0.034                                      | 0.082                             | NO                        | 0.073                                       | 0.126                             | NO                        | 0.016                                       | 0.064                             | NO                        |
| 8                               | -0.867                                      | -0.551                            | YES                       | -0.260                                      | -0.017                            | YES                       | 0.096                                       | 0.213                             | NO                        | -0.062                                      | 0.021                             | NO                        |
| 9                               | -1.627                                      | -1.180                            | YES                       | -0.791                                      | -0.696                            | YES                       | -0.285                                      | -0.049                            | YES                       | -0.032                                      | 0.035                             | NO                        |
| 10                              | -0.893                                      | -0.572                            | YES                       | -0.221                                      | -0.054                            | YES                       | 0.034                                       | 0.100                             | NO                        | -0.109                                      | 0.024                             | NO                        |
| 11                              | -1.254                                      | -0.530                            | YES                       | -0.852                                      | -0.325                            | YES                       | -0.688                                      | -0.549                            | YES                       | -0.003                                      | 0.055                             | NO                        |
| 12                              | -1.099                                      | -0.456                            | YES                       | -0.550                                      | -0.314                            | YES                       | -0.076                                      | 0.130                             | NO                        | -0.061                                      | 0.033                             | NO                        |
| 13                              | -0.752                                      | -0.507                            | YES                       | 0.056                                       | 0.164                             | NO                        | 0.033                                       | 0.089                             | NO                        | -0.032                                      | 0.042                             | NO                        |
| 14                              | -1.025                                      | -0.774                            | YES                       | -0.314                                      | -0.177                            | YES                       | -0.114                                      | 0.061                             | NO                        | 0.022                                       | 0.080                             | NO                        |
| 15                              | -0.458                                      | -0.171                            | YES                       | 0.033                                       | 0.088                             | NO                        | 0.039                                       | 0.131                             | NO                        | 0.052                                       | 0.095                             | NO                        |
| 16                              | -0.952                                      | -0.770                            | YES                       | -0.393                                      | -0.294                            | YES                       | -0.072                                      | 0.014                             | NO                        | -0.029                                      | 0.037                             | NO                        |
| 17                              | -0.658                                      | -0.485                            | YES                       | -0.104                                      | -0.020                            | YES                       | 0.055                                       | 0.130                             | NO                        | 0.004                                       | 0.064                             | NO                        |
| 18                              | -0.937                                      | -0.492                            | YES                       | -0.746                                      | -0.174                            | YES                       | -0.316                                      | -0.068                            | YES                       | 0.035                                       | 0.076                             | NO                        |
| 20                              | -1.221                                      | -0.775                            | YES                       | -0.609                                      | -0.447                            | YES                       | -0.072                                      | 0.105                             | NO                        | -0.004                                      | 0.065                             | NO                        |
| 21                              | -0.964                                      | -0.705                            | YES                       | -0.059                                      | 0.027                             | NO                        | 0.008                                       | 0.110                             | NO                        | 0.018                                       | 0.080                             | NO                        |
| 22                              | -1.262                                      | -1.024                            | YES                       | -0.586                                      | -0.485                            | YES                       | 0.043                                       | 0.132                             | NO                        | -0.025                                      | 0.037                             | NO                        |
| 23                              | -0.434                                      | -0.190                            | YES                       | 0.048                                       | 0.105                             | NO                        | -0.063                                      | -0.002                            | YES <sup>d</sup>          | -0.011                                      | 0.052                             | NO                        |
| 24                              | -1.250                                      | -0.863                            | YES                       | -0.478                                      | -0.287                            | YES                       | -0.300                                      | -0.120                            | YES                       | -0.069                                      | 0.006                             | NO                        |
| 25                              | -1.000                                      | -0.790                            | YES                       | -0.388                                      | -0.258                            | YES                       | -0.057                                      | 0.008                             | NO                        | -0.081                                      | 0.016                             | NO                        |
| 26                              | -1.155                                      | -1.033                            | YES                       | 0.079                                       | 0.188                             | NO                        | 0.006                                       | 0.074                             | NO                        | 0.029                                       | 0.115                             | NO                        |
| 27                              | -1.236                                      | -0.981                            | YES                       | -0.272                                      | -0.188                            | YES                       | -0.052                                      | 0.051                             | NO                        | 0.028                                       | 0.057                             | NO                        |
| 28                              | -1.245                                      | -0.666                            | YES                       | -0.306                                      | -0.231                            | YES                       | -0.036                                      | 0.024                             | NO                        | -0.012                                      | 0.052                             | NO                        |
| 31                              | -1.200                                      | -0.893                            | YES                       | -1.003                                      | -0.725                            | YES                       | -0.334                                      | -0.127                            | YES                       | -0.016                                      | 0.037                             | NO                        |
| 32                              | -1.343                                      | -0.795                            | YES                       | 0.013                                       | 0.094                             | NO                        | -0.037                                      | 0.021                             | NO                        | -0.038                                      | 0.034                             | NO                        |
| 33                              | -1.847                                      | -1.259                            | YES                       | -1.424                                      | -0.674                            | YES                       | -0.216                                      | 0.220                             | NO                        | -0.013                                      | 0.044                             | NO                        |
| 34                              | -1.071                                      | -0.907                            | YES                       | -0.113                                      | -0.047                            | YES                       | -0.082                                      | 0.020                             | NO                        | 0.000                                       | 0.076                             | NO                        |
| 35                              | -1.077                                      | -0.741                            | YES                       | -0.236                                      | -0.125                            | YES                       | 0.023                                       | 0.173                             | NO                        | -0.024                                      | 0.035                             | NO                        |
| 38                              | -0.991                                      | -0.827                            | YES                       | 0.029                                       | 0.131                             | NO                        | -0.016                                      | 0.062                             | NO                        | -0.061                                      | 0.005                             | NO                        |
| 39                              | -0.825                                      | -0.686                            | YES                       | -0.005                                      | 0.078                             | NO                        | -0.042                                      | 0.024                             | NO                        | -0.056                                      | 0.014                             | NO                        |
| 40                              | -1.395                                      | -1.192                            | YES                       | -0.928                                      | -0.823                            | YES                       | -0.276                                      | -0.060                            | YES                       | -0.038                                      | 0.012                             | NO                        |
| 41                              | -1.078                                      | -0.746                            | YES                       | -0.067                                      | 0.029                             | NO                        | -0.026                                      | 0.057                             | NO                        | -0.015                                      | 0.058                             | NO                        |
| 42                              | -0.948                                      | -0.680                            | YES                       | 0.020                                       | 0.083                             | NO                        | 0.043                                       | 0.115                             | NO                        | -0.016                                      | 0.052                             | NO                        |
| 43                              | -1.071                                      | -0.753                            | YES                       | -0.276                                      | -0.165                            | YES                       | 0.066                                       | 0.146                             | NO                        | 0.012                                       | 0.084                             | NO                        |
| 44                              | -0.724                                      | -0.522                            | YES                       | 0.004                                       | 0.088                             | NO                        | 0.027                                       | 0.131                             | NO                        | 0.014                                       | 0.075                             | NO                        |
| 45                              | -1.151                                      | -0.913                            | YES                       | -0.428                                      | -0.232                            | YES                       | -0.034                                      | 0.118                             | NO                        | -0.002                                      | 0.072                             | NO                        |
| 46                              | -1.165                                      | -0.925                            | YES                       | -0.112                                      | 0.015                             | NO                        | 0.037                                       | 0.103                             | NO                        | 0.028                                       | 0.078                             | NO                        |
| 47                              | -1.691                                      | -1.274                            | YES                       | -0.598                                      | -0.449                            | YES                       | -0.105                                      | 0.077                             | NO                        | 0.010                                       | 0.050                             | NO                        |
| 48                              | -0.704                                      | -0.456                            | YES                       | -0.022                                      | 0.100                             | NO                        | 0.050                                       | 0.159                             | NO                        | -0.001                                      | 0.083                             | NO                        |
| 51                              | -0.815                                      | -0.583                            | YES                       | 0.011                                       | 0.090                             | NO                        | 0.049                                       | 0.146                             | NO                        | 0.015                                       | 0.071                             | NO                        |
| 52                              | -0.867                                      | -0.613                            | YES                       | 0.020                                       | 0.089                             | NO                        | 0.027                                       | 0.110                             | NO                        | 0.000                                       | 0.045                             | NO                        |
| 53                              | -1.124                                      | -0.966                            | YES                       | -0.018                                      | 0.070                             | NO                        | 0.069                                       | 0.176                             | NO                        | -0.007                                      | 0.053                             | NO                        |
| 54                              | -0.621                                      | -0.392                            | YES                       | 0.024                                       | 0.122                             | NO                        | 0.085                                       | 0.129                             | NO                        | -0.016                                      | 0.039                             | NO                        |
| 55                              | -1.944                                      | -1.444                            | YES                       | -0.713                                      | -0.637                            | YES                       | -0.231                                      | -0.070                            | YES                       | -0.018                                      | 0.082                             | NO                        |
| 56                              | -1.274                                      | -0.956                            | YES                       | -0.176                                      | -0.065                            | YES                       | 0.070                                       | 0.125                             | NO                        | 0.003                                       | 0.108                             | NO                        |
| 57                              | -1.984                                      | -1.181                            | YES                       | -1.137                                      | -0.805                            | YES                       | -0.248                                      | -0.011                            | YES                       | -0.017                                      | 0.041                             | NO                        |
| 58                              | -1.509                                      | 0.613                             | NO <sup>d</sup>           | -1.205                                      | -0.582                            | YES                       | -0.185                                      | 0.143                             | NO                        | 0.021                                       | 0.088                             | NO                        |
| 59                              | -1.610                                      | -1.273                            | YES                       | -1.048                                      | -0.924                            | YES                       | -0.070                                      | 0.043                             | NO                        | -0.027                                      | 0.006                             | NO                        |
| 60                              | -0.990                                      | -0.676                            | YES                       | 0.043                                       | 0.134                             | NO                        | 0.047                                       | 0.149                             | NO                        | -0.074                                      | -0.017                            | YES                       |
| 61                              | -1.409                                      | -1.165                            | YES                       | -0.378                                      | -0.211                            | YES                       | -0.084                                      | 0.102                             | NO                        | -0.026                                      | 0.030                             | NO                        |
| 64                              | -1.396                                      | -1.151                            | YES                       | -0.353                                      | -0.193                            | YES                       | 0.085                                       | 0.179                             | NO                        | -0.042                                      | 0.006                             | NO                        |
| 65                              | -1.425                                      | -1.057                            | YES                       | -0.079                                      | 0.030                             | NO                        | -0.005                                      | 0.068                             | NO                        | -0.046                                      | 0.020                             | NO                        |
| 66                              | -0.904                                      | -0.545                            | YES                       | 0.120                                       | 0.223                             | NO                        | 0.053                                       | 0.111                             | NO                        | -0.017                                      | 0.030                             | NO                        |
| 67                              | -1.369                                      | -0.894                            | YES                       | -0.617                                      | -0.453                            | YES                       | 0.005                                       | 0.109                             | NO                        | -0.054                                      | 0.017                             | NO                        |
| 68                              | -1.437                                      | -0.679                            | YES                       | -0.576                                      | -0.427                            | YES                       | -0.135                                      | 0.023                             | NO                        | -0.042                                      | 0.078                             | NO                        |
| 69                              | -1.123                                      | -0.894                            | YES                       | -0.490                                      | -0.348                            | YES                       | 0.003                                       | 0.079                             | NO                        | 0.012                                       | 0.078                             | NO                        |

Table S2. Cont.

| High-temperature adapted clones | Mean absolute fitness at 17 °C <sup>a</sup> | 95% CI (upper limit) <sup>b</sup> | Less than 0? <sup>c</sup> | Mean absolute fitness at 18 °C <sup>a</sup> | 95% CI (upper limit) <sup>b</sup> | Less than 0? <sup>c</sup> | Mean absolute fitness at 19 °C <sup>a</sup> | 95% CI (upper limit) <sup>b</sup> | Less than 0? <sup>c</sup> | Mean absolute fitness at 45 °C <sup>a</sup> | 95% CI (upper limit) <sup>b</sup> | Less than 0? <sup>c</sup> |
|---------------------------------|---------------------------------------------|-----------------------------------|---------------------------|---------------------------------------------|-----------------------------------|---------------------------|---------------------------------------------|-----------------------------------|---------------------------|---------------------------------------------|-----------------------------------|---------------------------|
| 70                              | -0.885                                      | -0.670                            | YES                       | 0.093                                       | 0.211                             | NO                        | 0.054                                       | 0.169                             | NO                        | -0.001                                      | 0.031                             | NO                        |
| 71                              | -1.313                                      | -0.828                            | YES                       | -1.070                                      | -0.845                            | YES                       | -0.166                                      | 0.059                             | NO                        | -0.016                                      | 0.038                             | NO                        |
| 72                              | -1.352                                      | -1.068                            | YES                       | -0.148                                      | 0.000                             | YES                       | -0.060                                      | 0.098                             | NO                        | -0.010                                      | 0.038                             | NO                        |
| 73                              | -0.648                                      | -0.367                            | YES                       | -0.091                                      | 0.034                             | NO                        | 0.092                                       | 0.166                             | NO                        | -0.048                                      | 0.019                             | NO                        |
| 74                              | -1.193                                      | -0.245                            | YES                       | -0.677                                      | -0.419                            | YES                       | -0.129                                      | 0.063                             | NO                        | 0.041                                       | 0.093                             | NO                        |
| 75                              | -1.871                                      | -1.511                            | YES                       | -0.808                                      | -0.426                            | YES                       | -0.093                                      | 0.097                             | NO                        | -0.006                                      | 0.075                             | NO                        |
| 76                              | -1.305                                      | -1.026                            | YES                       | -0.686                                      | -0.478                            | YES                       | -0.606                                      | -0.447                            | YES                       | -0.012                                      | 0.079                             | NO                        |
| 77                              | -1.199                                      | -0.947                            | YES                       | -0.321                                      | -0.228                            | YES                       | 0.021                                       | 0.114                             | NO                        | -0.092                                      | -0.008                            | YES                       |
| 78                              | -0.634                                      | -0.546                            | YES                       | 0.040                                       | 0.144                             | NO                        | 0.039                                       | 0.116                             | NO                        | -0.027                                      | 0.021                             | NO                        |
| 79                              | -1.189                                      | -1.035                            | YES                       | -0.077                                      | 0.020                             | NO                        | 0.077                                       | 0.156                             | NO                        | -0.068                                      | 0.018                             | NO                        |
| 80                              | -1.058                                      | -0.818                            | YES                       | 0.033                                       | 0.128                             | NO                        | 0.012                                       | 0.081                             | NO                        | -0.007                                      | 0.057                             | NO                        |
| 81                              | -0.885                                      | -0.714                            | YES                       | 0.043                                       | 0.136                             | NO                        | 0.049                                       | 0.104                             | NO                        | -0.028                                      | 0.047                             | NO                        |
| 82                              | -0.674                                      | -0.416                            | YES                       | 0.071                                       | 0.132                             | NO                        | -0.003                                      | 0.079                             | NO                        | -0.044                                      | 0.006                             | NO                        |
| 83                              | -1.128                                      | -0.716                            | YES                       | -0.034                                      | 0.042                             | NO                        | 0.043                                       | 0.108                             | NO                        | -0.034                                      | 0.006                             | NO                        |
| 84                              | -0.913                                      | -0.540                            | YES                       | -0.009                                      | 0.109                             | NO                        | 0.062                                       | 0.139                             | NO                        | -0.013                                      | 0.046                             | NO                        |
| 85                              | -1.602                                      | -0.979                            | YES                       | -0.756                                      | -0.605                            | YES                       | -0.206                                      | 0.039                             | NO                        | -0.019                                      | 0.017                             | NO                        |
| 86                              | -1.587                                      | -1.280                            | YES                       | -0.089                                      | 0.268                             | NO                        | -0.041                                      | 0.061                             | NO                        | -0.005                                      | 0.032                             | NO                        |
| 87                              | -0.607                                      | -0.510                            | YES                       | 0.074                                       | 0.162                             | NO                        | 0.044                                       | 0.111                             | NO                        | -0.009                                      | 0.062                             | NO                        |
| 89                              | -0.995                                      | -0.802                            | YES                       | -0.003                                      | 0.037                             | NO                        | 0.040                                       | 0.122                             | NO                        | -0.001                                      | 0.057                             | NO                        |
| 91                              | -1.584                                      | -1.189                            | YES                       | -0.806                                      | -0.491                            | YES                       | 0.020                                       | 0.094                             | NO                        | -0.026                                      | 0.023                             | NO                        |
| 92                              | -1.943                                      | -1.370                            | YES                       | -0.725                                      | -0.440                            | YES                       | -0.353                                      | -0.101                            | YES                       | -0.074                                      | 0.023                             | NO                        |
| 93                              | -1.079                                      | -0.735                            | YES                       | -0.118                                      | 0.019                             | NO                        | 0.048                                       | 0.094                             | NO                        | -0.037                                      | 0.057                             | NO                        |
| 94                              | -0.844                                      | -0.570                            | YES                       | 0.113                                       | 0.215                             | NO                        | 0.070                                       | 0.141                             | NO                        | 0.006                                       | 0.054                             | NO                        |
| 95                              | -0.981                                      | -0.822                            | YES                       | 0.015                                       | 0.126                             | NO                        | 0.022                                       | 0.081                             | NO                        | -0.009                                      | 0.026                             | NO                        |
| 96                              | -0.747                                      | -0.573                            | YES                       | 0.086                                       | 0.175                             | NO                        | -0.015                                      | 0.084                             | NO                        | -0.004                                      | 0.043                             | NO                        |
| 97                              | -1.270                                      | -0.675                            | YES                       | -0.119                                      | 0.011                             | NO                        | 0.032                                       | 0.075                             | NO                        | -0.157                                      | 0.038                             | NO                        |
| 101                             | -0.838                                      | -0.539                            | YES                       | 0.009                                       | 0.189                             | NO                        | 0.097                                       | 0.182                             | NO                        | 0.043                                       | 0.089                             | NO                        |
| 105                             | -0.591                                      | -0.343                            | YES                       | 0.023                                       | 0.119                             | NO                        | 0.036                                       | 0.094                             | NO                        | -0.008                                      | 0.051                             | NO                        |
| 106                             | -1.258                                      | -0.974                            | YES                       | 0.081                                       | 0.151                             | NO                        | 0.092                                       | 0.159                             | NO                        | -0.016                                      | 0.031                             | NO                        |
| 107                             | -0.956                                      | 1.094                             | NO <sup>d</sup>           | -0.690                                      | -0.334                            | YES                       | -0.354                                      | -0.072                            | YES                       | -0.032                                      | 0.023                             | NO                        |
| 108                             | -1.043                                      | -0.782                            | YES                       | 0.080                                       | 0.162                             | NO                        | 0.050                                       | 0.107                             | NO                        | 0.026                                       | 0.068                             | NO                        |
| 110                             | -1.283                                      | -1.033                            | YES                       | 0.136                                       | 0.380                             | NO                        | 0.069                                       | 0.141                             | NO                        | 0.028                                       | 0.066                             | NO                        |
| 112                             | -1.289                                      | -0.858                            | YES                       | -0.024                                      | 0.045                             | NO                        | -0.002                                      | 0.120                             | NO                        | 0.039                                       | 0.074                             | NO                        |
| 114                             | -1.658                                      | -0.794                            | YES                       | -0.808                                      | -0.680                            | YES                       | -0.228                                      | 0.002                             | NO                        | -0.380                                      | 0.058                             | NO                        |
| 118                             | -1.609                                      | -1.256                            | YES                       | -0.372                                      | -0.249                            | YES                       | -0.159                                      | 0.040                             | NO                        | 0.044                                       | 0.088                             | NO                        |
| 119                             | -1.137                                      | -0.759                            | YES                       | -0.298                                      | -0.124                            | YES                       | -0.100                                      | 0.085                             | NO                        | 0.005                                       | 0.076                             | NO                        |
| 120                             | -1.414                                      | -1.239                            | YES                       | -0.223                                      | 0.005                             | NO                        | -0.021                                      | 0.277                             | NO                        | 0.041                                       | 0.083                             | NO                        |
| 122                             | -1.120                                      | -0.975                            | YES                       | -0.664                                      | -0.430                            | YES                       | 0.023                                       | 0.100                             | NO                        | 0.023                                       | 0.099                             | NO                        |
| 124                             | -1.662                                      | -1.415                            | YES                       | -0.536                                      | -0.360                            | YES                       | -0.036                                      | 0.021                             | NO                        | -0.008                                      | 0.084                             | NO                        |
| 126                             | -0.599                                      | -0.371                            | YES                       | 0.012                                       | 0.037                             | NO                        | 0.065                                       | 0.132                             | NO                        | -0.052                                      | 0.042                             | NO                        |
| 127                             | -1.398                                      | -1.121                            | YES                       | -0.257                                      | -0.083                            | YES                       | -0.153                                      | 0.018                             | NO                        | 0.014                                       | 0.097                             | NO                        |
| 130                             | -1.369                                      | -1.058                            | YES                       | -0.454                                      | -0.303                            | YES                       | -0.114                                      | -0.004                            | YES                       | 0.060                                       | 0.157                             | NO                        |
| 131                             | -0.426                                      | -0.274                            | YES                       | -0.035                                      | 0.031                             | NO                        | 0.065                                       | 0.111                             | NO                        | -0.137                                      | -0.066                            | YES                       |
| 132                             | -0.449                                      | -0.292                            | YES                       | -0.010                                      | 0.099                             | NO                        | 0.039                                       | 0.124                             | NO                        | 0.200                                       | 0.500                             | NO                        |
| 133                             | -1.731                                      | -1.523                            | YES                       | -0.834                                      | -0.669                            | YES                       | -0.840                                      | -0.595                            | YES                       | 0.049                                       | 0.157                             | NO                        |
| 134                             | -0.563                                      | -0.263                            | YES                       | 0.004                                       | 0.089                             | NO                        | 0.070                                       | 0.146                             | NO                        | -0.319                                      | 0.172                             | NO                        |
| 135                             | -1.491                                      | -1.251                            | YES                       | -0.387                                      | -0.234                            | YES                       | -0.107                                      | 0.098                             | NO                        | 0.038                                       | 0.095                             | NO                        |
| 136                             | -1.548                                      | -1.160                            | YES                       | -0.364                                      | -0.286                            | YES                       | -0.185                                      | 0.062                             | NO                        | 0.024                                       | 0.072                             | NO                        |
| 137                             | -1.172                                      | -0.933                            | YES                       | -0.111                                      | 0.028                             | NO                        | 0.046                                       | 0.156                             | NO                        | -0.015                                      | 0.024                             | NO                        |
| 138                             | -0.986                                      | -0.700                            | YES                       | -0.061                                      | 0.047                             | NO                        | 0.043                                       | 0.179                             | NO                        | -0.033                                      | 0.033                             | NO                        |
| 139                             | -1.074                                      | -0.803                            | YES                       | 0.018                                       | 0.118                             | NO                        | 0.032                                       | 0.101                             | NO                        | 0.016                                       | 0.054                             | NO                        |
| 140                             | -0.939                                      | -0.657                            | YES                       | 0.020                                       | 0.088                             | NO                        | 0.070                                       | 0.148                             | NO                        | 0.014                                       | 0.063                             | NO                        |
| 141                             | -0.801                                      | -0.463                            | YES                       | -0.005                                      | 0.068                             | NO                        | 0.105                                       | 0.197                             | NO                        | 0.000                                       | 0.072                             | NO                        |
| 142                             | -1.078                                      | -0.784                            | YES                       | 0.001                                       | 0.129                             | NO                        | 0.106                                       | 0.181                             | NO                        | -0.067                                      | 0.000                             | NO                        |
| 143                             | -0.508                                      | -0.174                            | YES                       | -0.023                                      | 0.041                             | NO                        | 0.062                                       | 0.122                             | NO                        | -0.062                                      | -0.012                            | YES                       |
| REL1206                         | -0.413                                      | -0.264                            | YES                       | 0.000                                       | 0.075                             | NO                        | -0.004                                      | 0.070                             | NO                        | -0.290                                      | 0.097                             | NO                        |

<sup>a</sup>Mean absolute fitness (slope of the fitted linear regression) based on three replicates.

<sup>b</sup>One-sided confidence interval at 95% based on 3 replicates.

<sup>c</sup>The null hypothesis is that the mean absolute fitness equals 0. If the one-sided interval is equal to zero, the absolute fitness is not less than zero (NO); if the one-sided interval is less than zero the absolute fitness is less than zero (YES).

<sup>d</sup>The populations go extinct between day 1 and 2, resulting in a large variance and an underestimation of the mean absolute fitness.

**Table S3. Oligonucleotides and primers used in this study**

---

| Oligos used for recombineering to create <i>rpoB</i> and <i>rho</i> mutants      |                                                                                                     |
|----------------------------------------------------------------------------------|-----------------------------------------------------------------------------------------------------|
| <i>rpoB</i> I966S (T2897G)                                                       | 5'-CAG CAC GGA TAC GGC TGA ACA GAC CCG CTT CGA GGC TCT GCA GTT CTT CAG ACA GGT CTT TCT TCG CCT G-3' |
| <i>rho</i> I15N (T44A)                                                           | 5'-CAG GTT TTC CAG CCC CAT ATT TTC GCC GAG AGT GTT CAG CTC AGA AAC CGG CGT ATT CTT TAA TTC GGT-3'   |
| <i>araA</i> D92G (A275G)                                                         | 5'-CAC ACC TTC TCC CCG GCC AAA ATG TGG ATC AAC GGC CTG ACC ATG CTC AAC AAA CCG TTG CTG CAA TTC C-3' |
| Primer pair used for PCR amplification of <i>rpoB</i> or <i>rho</i> genic region |                                                                                                     |
| Primers to amplify the <i>rpoB</i> region (368 bp)                               |                                                                                                     |
| I966 Forward                                                                     | 5'-TAA GGT TAC GCC GAA AGG TG-3'                                                                    |
| I966 Reverse                                                                     | 5'-GTT TCT CTT CGT CGG TCA GG-3'                                                                    |
| Primers to amplify the <i>rho</i> region (373 bp)                                |                                                                                                     |
| I15 Forward                                                                      | 5'-GAC CGT AAA CAG GCA TGG AT-3'                                                                    |
| I15 Reverse                                                                      | 5'-GTA TCA CCA GTG CGG AGG TT-3'                                                                    |

---
